# Supplementary material
Source: PubMed Central journal article supplement (PMC7596971)
Supplement: 12909_2020_2312_MOESM1_ESM.pdf [file 12909_2020_2312_MOESM1_ESM.pdf]

## Questionnaire

### STUDENT PERSPECTIVE OF CLASSROOM AND DISTANCE LEARNING METHOD DURING COVID-19 PANDEMIC IN THE UNDERGRADUATE DENTAL STUDY PROGRAM

Manuscript ID: MEED-D-20-00904

---

---

1. Year of Study\*
  - 2016
  - 2017
  - 2018
  - 2019 [Regular Class]
  - 2019 [International Class]
  
2. Gender\*
  - Male
  - Female
  
3. Grade Point Average (GPA) score\*  
(short answer)\_\_\_\_\_
  
4. Group discussion [QBL/CL/PBL] is more suitable delivered in classroom learning\*
  - Strongly agree
  - Agree
  - Disagree
  - Strongly disagree
  
5. Clarification session is more suitable delivered in distance learning\*
  - Strongly agree
  - Agree
  - Disagree
  - Strongly disagree
  
6. Assessment is more suitable delivered in distance learning\*
  - Strongly agree
  - Agree
  - Disagree
  - Strongly disagree
  
7. I do not experience stress during distance learning \*
  - Strongly agree
  - Agree
  - Disagree
  - Strongly disagree

8. I do not experience any problems during distance learning\*
- Strongly agree
  - Agree
  - Disagree
  - Strongly disagree
9. I have more time to prepare learning materials before group discussion with distance learning\*
- Strongly agree
  - Agree
  - Disagree
  - Strongly disagree
10. I have more time to review all of the learning materials after class with distance learning\*
- Strongly agree
  - Agree
  - Disagree
  - Strongly disagree
11. Distance learning give similar learning satisfaction than classroom learning\*
- Strongly agree
  - Agree
  - Disagree
  - Strongly disagree
12. Blended learning (combination of classroom and distance learning) can be implemented in the next semester\*
- Strongly agree
  - Agree
  - Disagree
  - Strongly disagree
13. Distance learning give motivation for self directed learning and eager to prepare learning materials before group discussion\*
- Strongly agree
  - Agree
  - Disagree
  - Strongly disagree
14. Communication with lecturers and fellow students is easier with distance learning\*
- Strongly agree
  - Agree
  - Disagree
  - Strongly disagree
15. I like distance learning more than classroom learning \*
- Strongly agree
  - Agree

- Disagree
- Strongly disagree

16. I study more efficiently with distance learning\*

- Strongly agree
- Agree
- Disagree
- Strongly disagree

17. Distance learning gives the opportunity for students to cheat during assessment\*

- Strongly agree
- Agree
- Disagree
- Strongly disagree

18. The most effective method for group discussion\*

- Synchronous, audio-video-text based
- Synchronous, audio-text based
- Synchronous, text based
- Asynchronous, audio-video-text based
- Asynchronous, audio-text based
- Asynchronous, text based

19. The most effective method for group clarification session\*

- Synchronous, audio-video-text based
- Synchronous, audio-text based
- Synchronous, text based
- Asynchronous, audio-video-text based
- Asynchronous, audio-text based
- Asynchronous, text based

20. The most effective method for group interactive lectures\*

- Synchronous, audio-video-text based
- Synchronous, audio-text based
- Synchronous, text based
- Asynchronous, audio-video-text based
- Asynchronous, audio-text based
- Asynchronous, text based

21. Challenges experienced during distance learning\*

Paragraph answer \_\_\_\_\_

22. Positive aspects of distance learning\*

Paragraph answer \_\_\_\_\_
